# Supplementary material for: Design and Usability Evaluation of Mobile Voice-Added Food Reporting for Elderly People: Randomized Controlled Trial
Source: PubMed Central journal article supplement (PMC7551114; doi:10.2196/20317), 2020-09-28
Supplement: mhealth_v8i9e20317_app5.pdf [file mhealth_v8i9e20317_app5.pdf]

# Pre-test Set

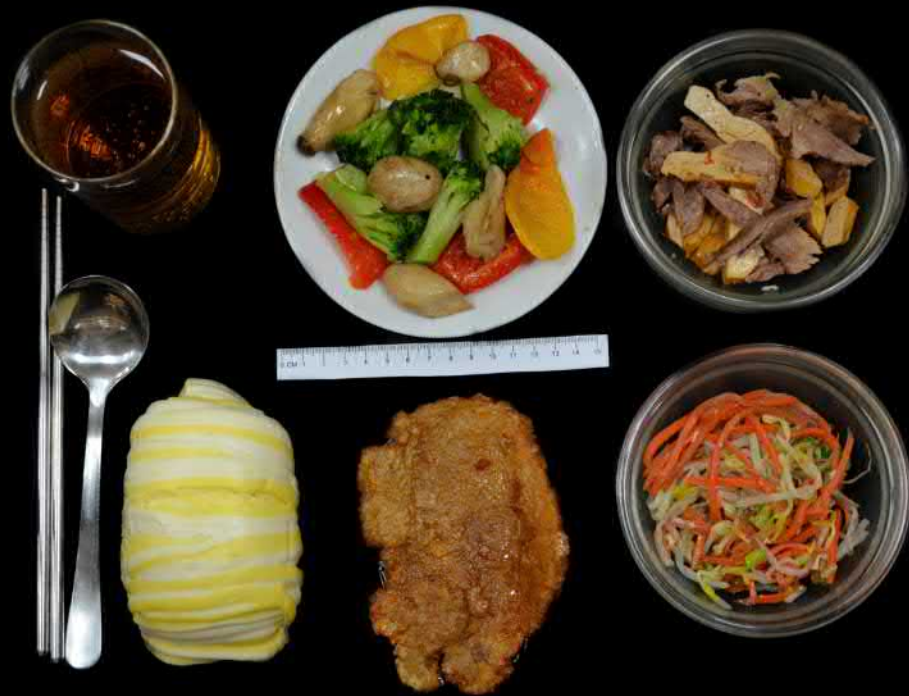

# Breakfast Set

**5** 豆漿

Soy milk

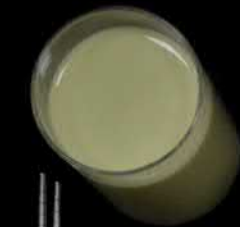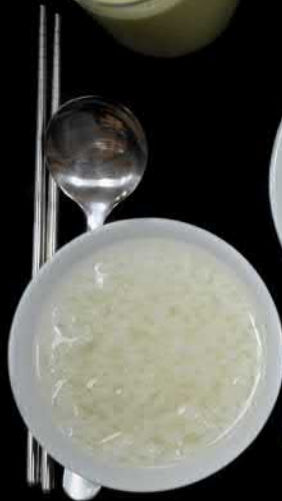

**1** 煮稀飯

Boiled rice porridge

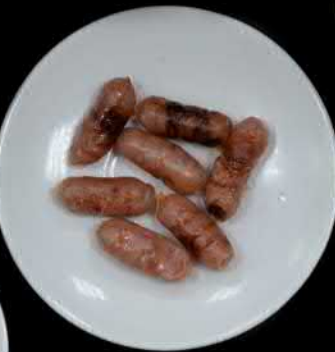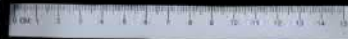

**2** 烤豬肉香腸

Grilled pork sausage

**4** 花豆滷麵腸

Stewed wheat gluten with peanuts

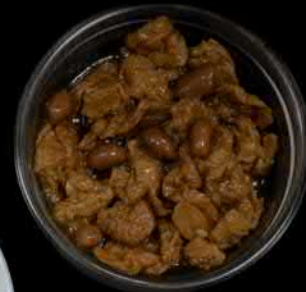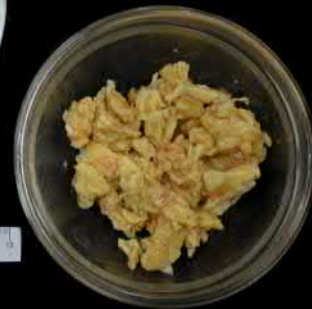

**3** 炒雞蛋

Stir-fried chicken egg

# Lunch Set

**6** 綠茶

Green tea

**5** 培根木耳炒高麗菜

Stir-fried cabbage with black fungus and bacon

**4** 豆腐炒四季豆

Stir-fried tofu with green bean

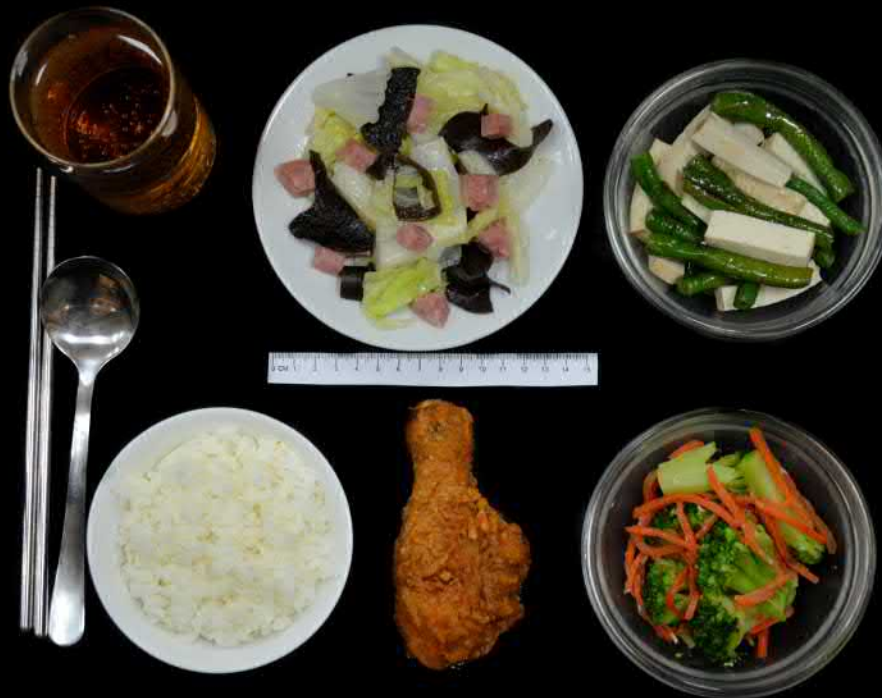

**1** 蒸白飯

Steamed rice

**2** 炸雞腿

Deep-fried chicken leg

**3** 花椰菜炒胡蘿蔔

Stir-fried broccoli with carrot

# Dinner Set

**6** 奶茶

Milk tea

**5** 胡蘿蔔炒甜椒炒豆

Stir-fried dry bean curd with bell pepper an

**4** 苦瓜炒鹹鴨蛋

Stir-fried bitter melon with salted duck egg

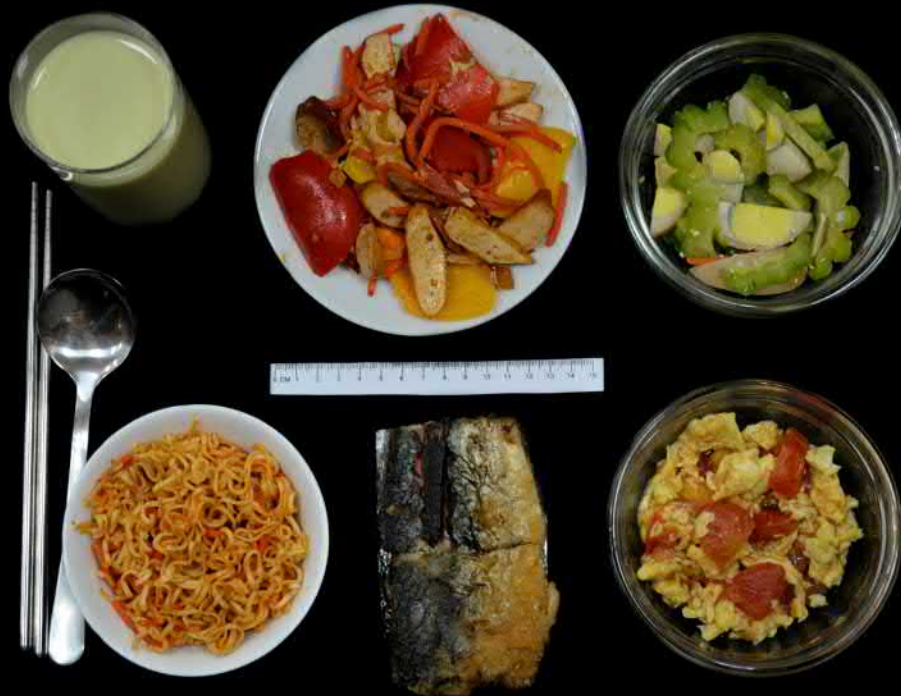

**1** 炒麵

Stir-fried noodle

**2** 煎鯖魚

Pan-fried mackerel

**3** 番茄炒雞蛋

Stir-fried chicken egg with tomato
